# Supplementary material for: Synthesis and characterisation of a quaternary nitride series with spin-glass behaviour: SnxGe1−xFe3N
Source: Royal Society of Chemistry journal article supplement (doi:10.1039/c8tc04500c), 2019-01-01
Supplement: c8tc04500c1.pdf [file c8tc04500c1.pdf]

# Supplementary Information to

## “Synthesis and characterisation of a quaternary nitride series with spin-glass behaviour: $\text{Sn}_x\text{Ge}_{1-x}\text{Fe}_3\text{N}$ ”

Tanja Scholz<sup>1</sup> and Richard Dronskowski<sup>1,\*</sup>

<sup>1</sup> Chair of Solid State and Quantum Chemistry, Institute of Inorganic Chemistry,  
RWTH Aachen University, D-52056 Aachen, Germany; tanja.scholz@rwth-aachen.de

\* Correspondence: drons@HAL9000.ac.rwth-aachen.de; Tel.: +49-241-80-93642; Fax: +49-241-80-92642

Supporting Figures:

X-ray diffraction pattern:

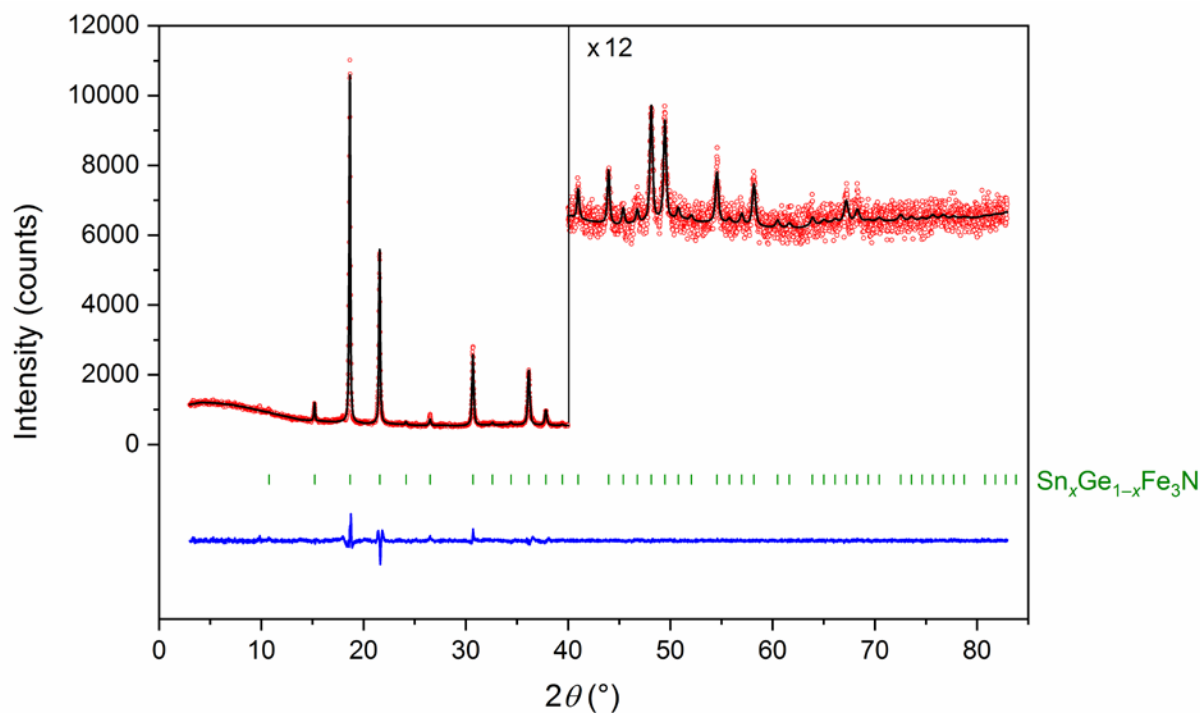

**Figure S1:** X-ray diffraction pattern measured with Mo  $K\alpha_1$  radiation and Rietveld refinement of the quaternary nitride  $^{1a}(\text{Sn}_{0.040(2)}\text{Ge}_{0.960(2)})^{3c}(\text{Fe}_3)^{1b}(\text{N})$  in space group  $Pm\bar{3}m$  ( $a = 3.7935(1)$  Å,  $R_B = 4.62\%$ ).

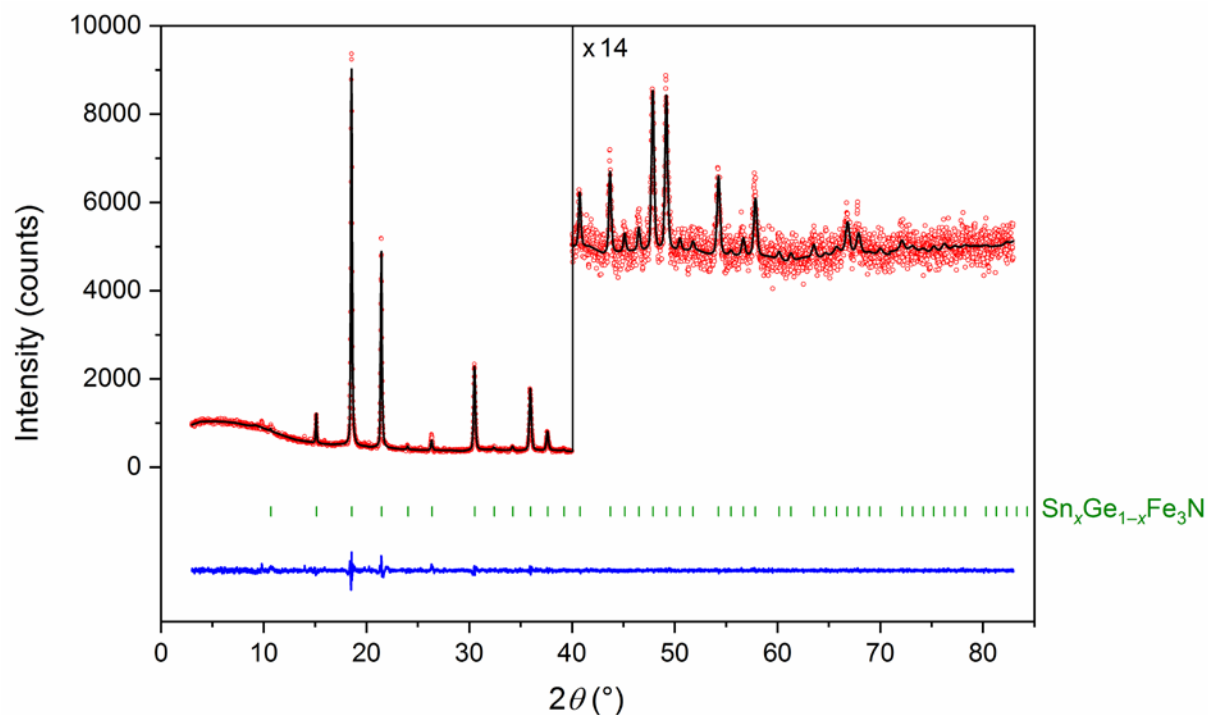

**Figure S2:** X-ray diffraction pattern measured with Mo  $K\alpha_1$  radiation and Rietveld refinement of the quaternary nitride  ${}^1a(\text{Sn}_{0.190(2)}\text{Ge}_{0.810(2)}){}^3c(\text{Fe}_3)1b(\text{N})$  in space group  $Pm\bar{3}m$  ( $a = 3.8122(1)$  Å,  $R_B = 3.46\%$ ).

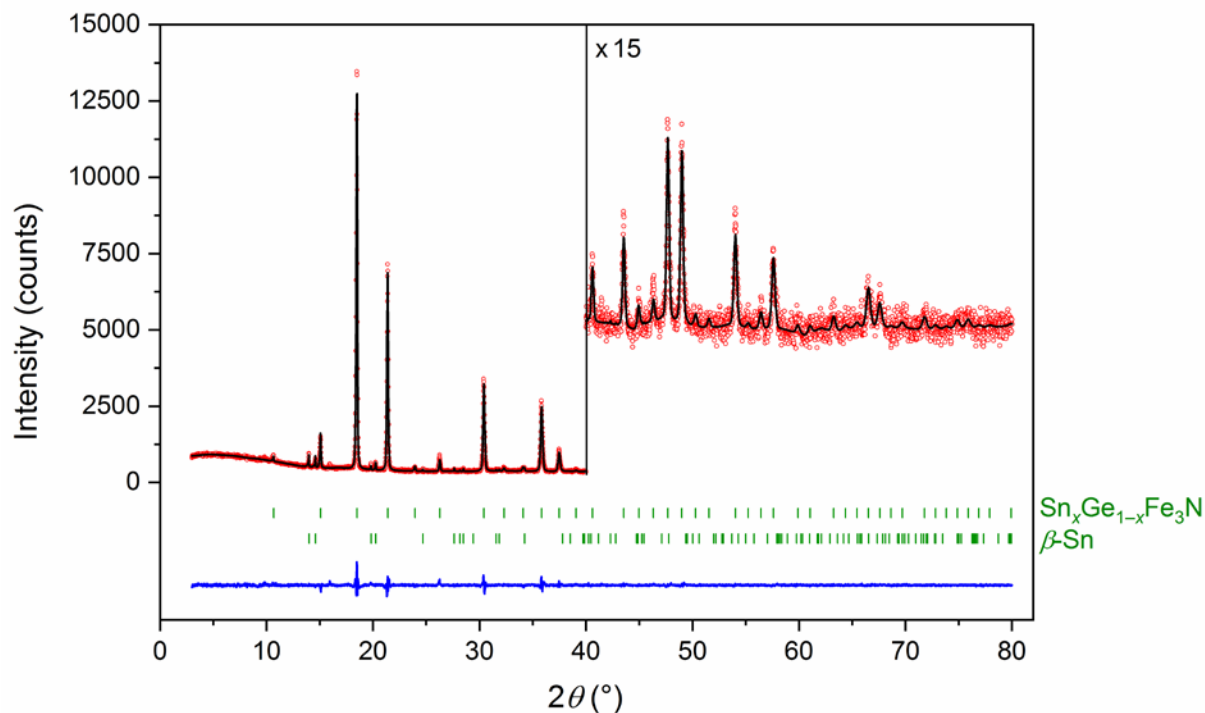

**Figure S3:** X-ray diffraction pattern measured with Mo  $K\alpha_1$  radiation and Rietveld refinement of the quaternary nitride  ${}^1a(\text{Sn}_{0.34(1)}\text{Ge}_{0.63(1)}\text{Fe}_{0.03(1)}){}^3c(\text{Fe}_3)1b(\text{N})$  in space group  $Pm\bar{3}m$  ( $a = 3.8273(1)$  Å,  $R_B = 2.76\%$ ) with 4% of a tin side phase.

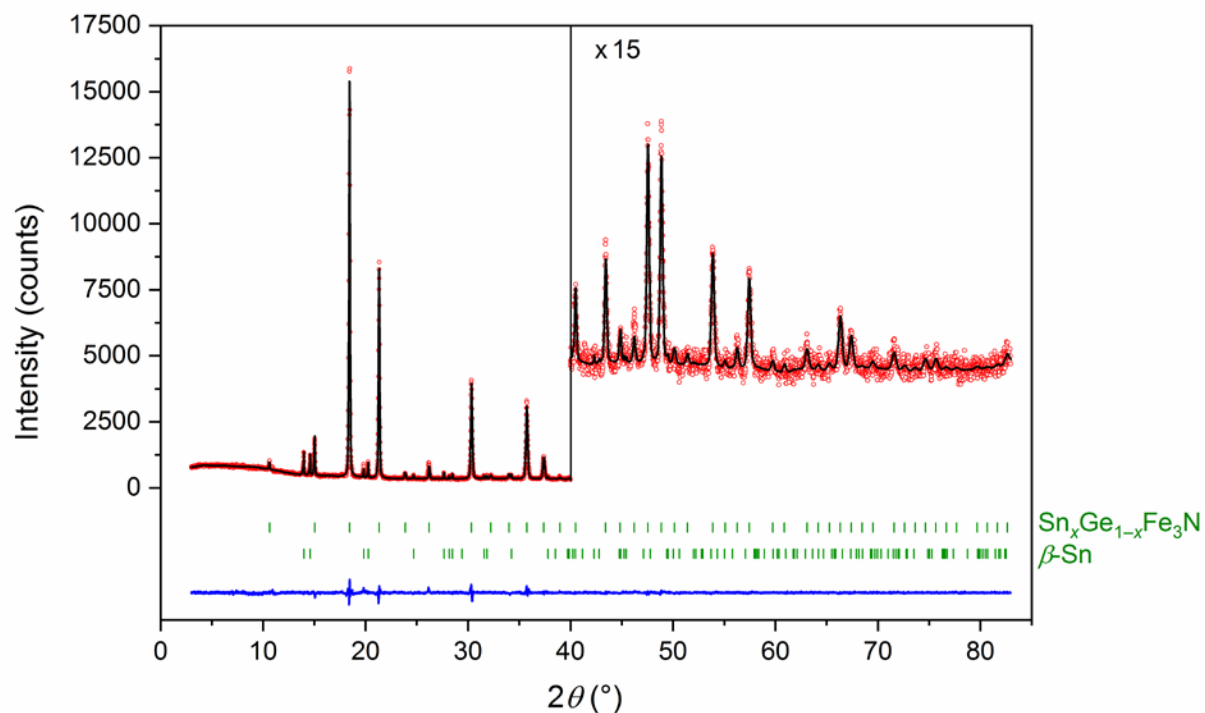

**Figure S4:** X-ray diffraction pattern measured with Mo  $K\alpha_1$  radiation and Rietveld refinement of the quaternary nitride  $^{1a}(\text{Sn}_{0.43(1)}\text{Ge}_{0.51(1)}\text{Fe}_{0.06(1)})^{3c}(\text{Fe}_3)^{1b}(\text{N})$  in space group  $Pm\bar{3}m$  ( $a = 3.8371(1)$  Å,  $R_B = 2.74\%$ ) with 8% of a tin side phase.

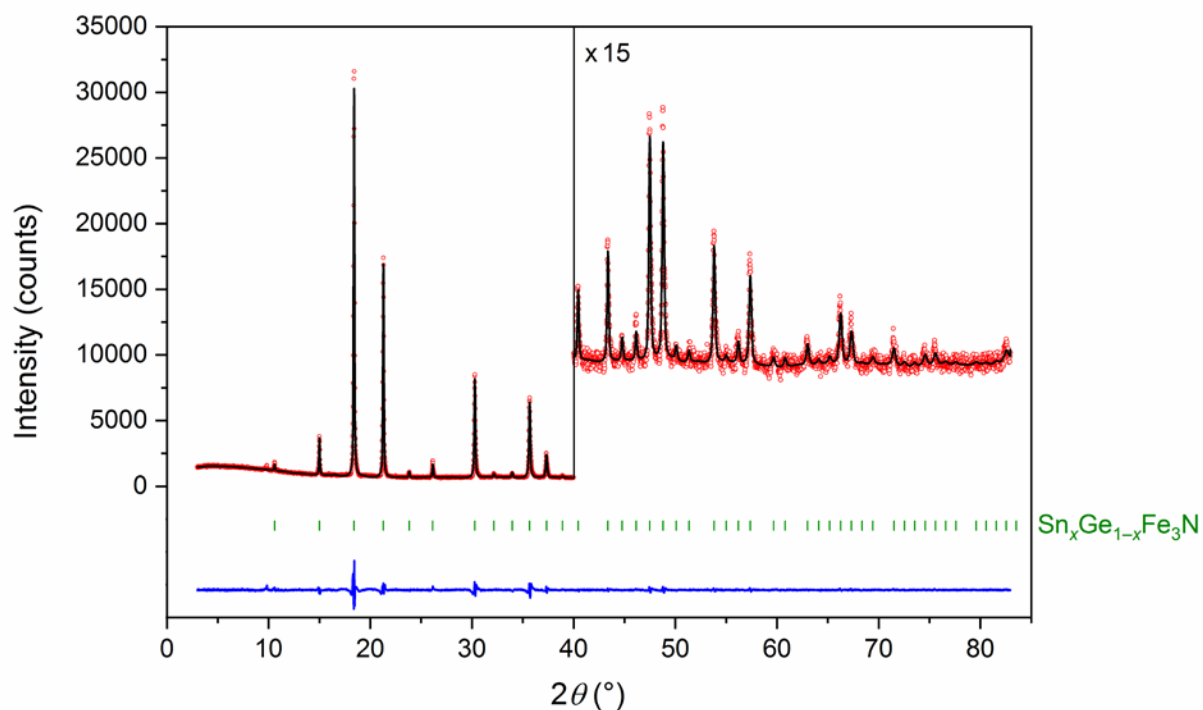

**Figure S5:** X-ray diffraction pattern measured with Mo  $K\alpha_1$  radiation and Rietveld refinement of the quaternary nitride  $^{1a}(\text{Sn}_{0.44(1)}\text{Ge}_{0.52(1)}\text{Fe}_{0.04(1)})^{3c}(\text{Fe}_3)^{1b}(\text{N})$  in space group  $Pm\bar{3}m$  ( $a = 3.8391(1)$  Å,  $R_B = 2.56\%$ ).

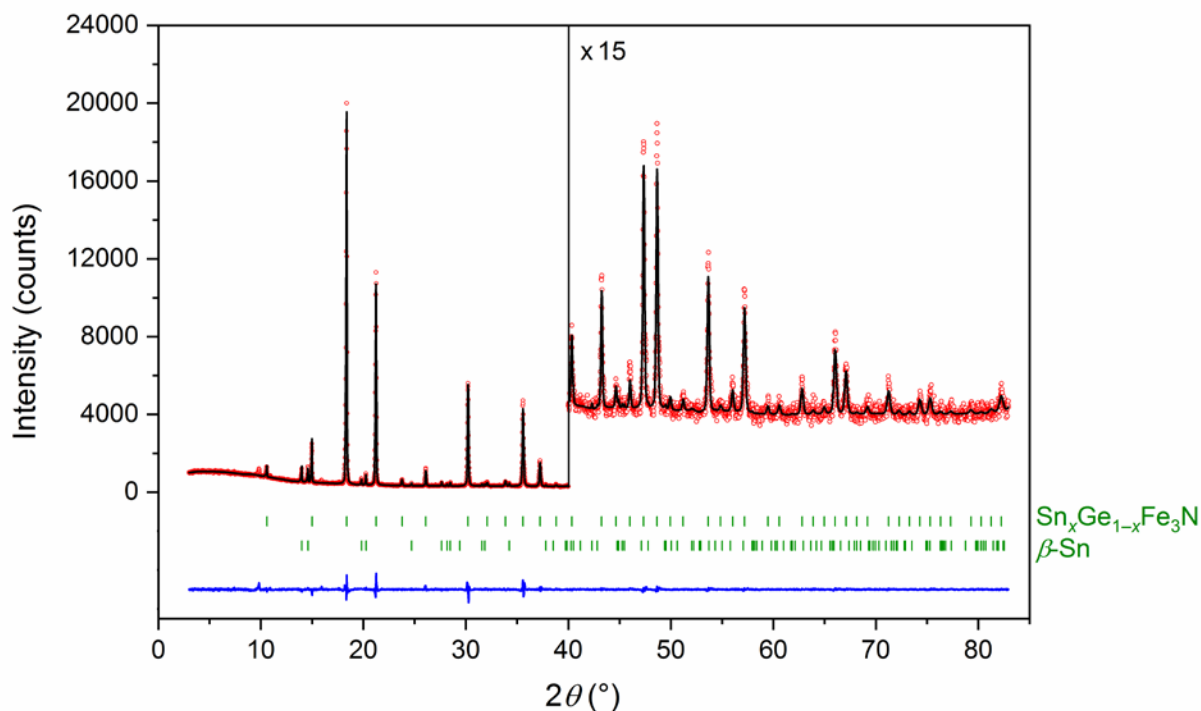

**Figure S6:** X-ray diffraction pattern measured with Mo  $K\alpha_1$  radiation and Rietveld refinement of the quaternary nitride  $^{1a}(\text{Sn}_{0.57(1)}\text{Ge}_{0.38(1)}\text{Fe}_{0.05(1)})^{3c}(\text{Fe}_3)^{1b}(\text{N})$  in space group  $Pm\bar{3}m$  ( $a = 3.8528(1)$  Å,  $R_B = 2.75\%$ ) with 7% of a tin side phase.

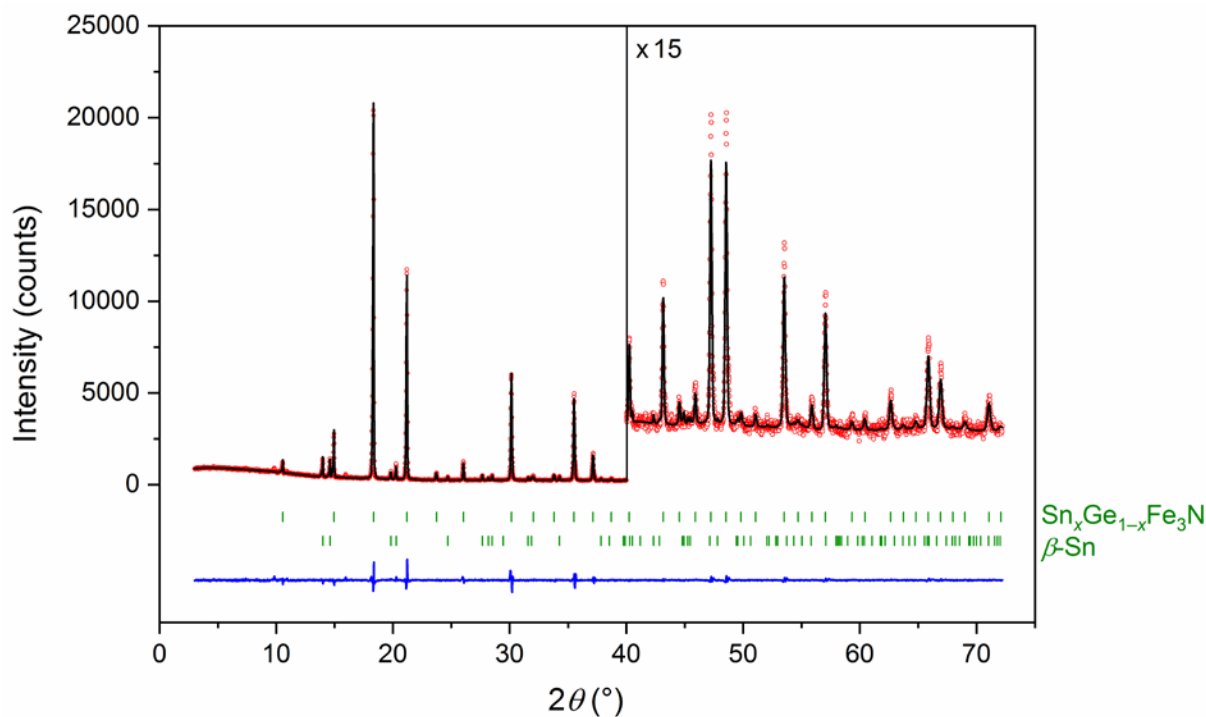

**Figure S7:** X-ray diffraction pattern measured with Mo  $K\alpha_1$  radiation and Rietveld refinement of the quaternary nitride  $^{1a}(\text{Sn}_{0.66(1)}\text{Ge}_{0.26(1)}\text{Fe}_{0.08(1)})^{3c}(\text{Fe}_3)^{1b}(\text{N})$  in space group  $Pm\bar{3}m$  ( $a = 3.8614(1)$  Å,  $R_B = 2.60\%$ ) with 9% of a tin side phase.

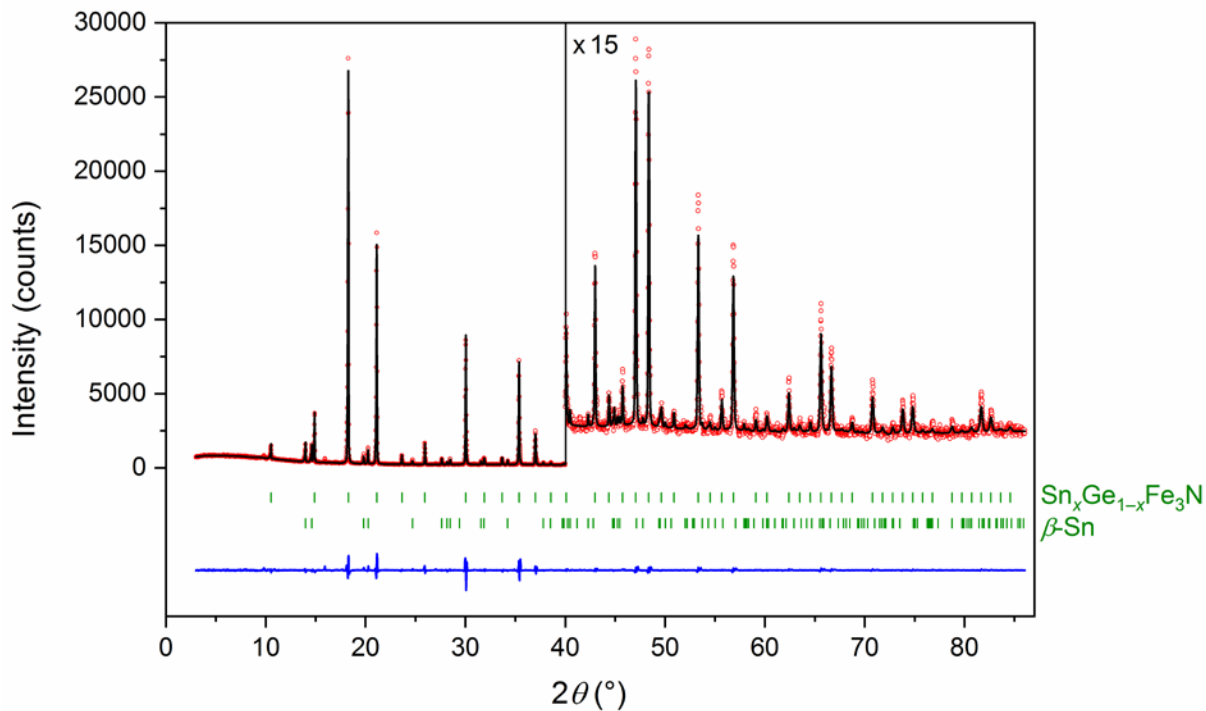

**Figure S8:** X-ray diffraction pattern measured with Mo  $K\alpha_1$  radiation and Rietveld refinement of the quaternary nitride  $^{1a}(\text{Sn}_{0.85(1)}\text{Ge}_{0.05(1)}\text{Fe}_{0.10(1)})^{3c}(\text{Fe}_3)^{1b}(\text{N})$  in space group  $Pm\bar{3}m$  ( $a = 3.8834(1)$  Å,  $R_B = 4.88\%$ ) with 12% of a tin side phase.

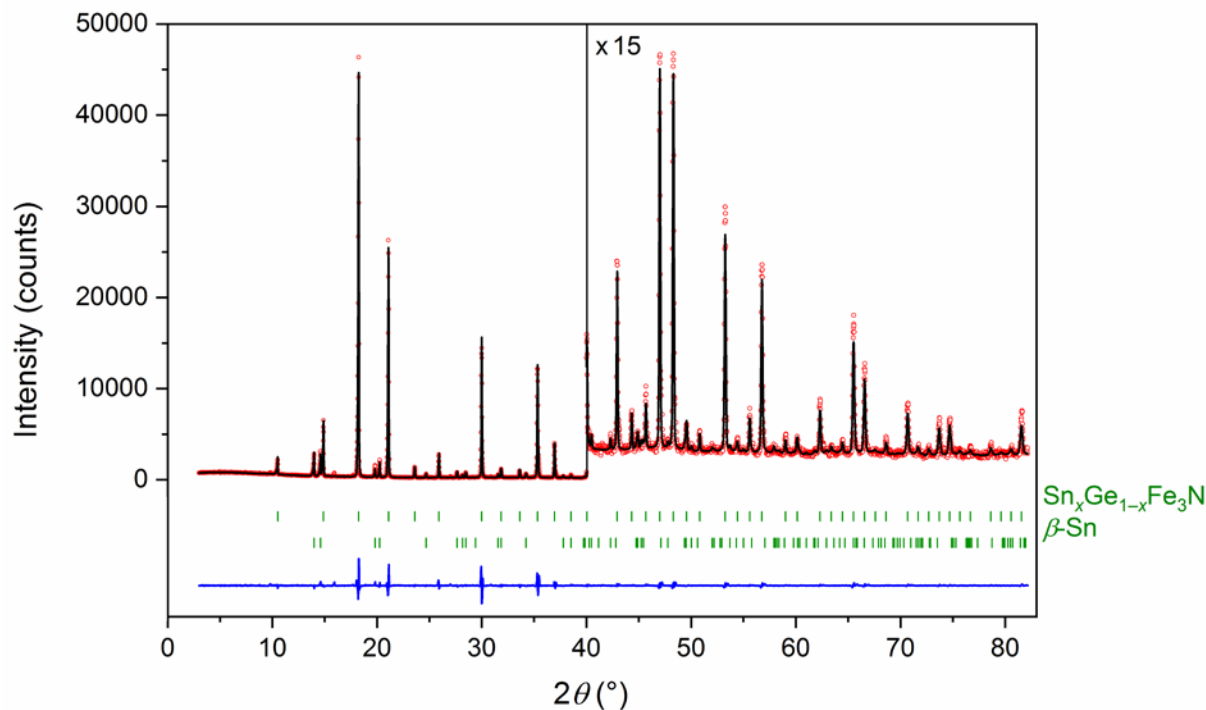

**Figure S9:** X-ray diffraction pattern measured with Mo  $K\alpha_1$  radiation and Rietveld refinement of the quaternary nitride  $^{1a}(\text{Sn}_{0.82(1)}\text{Ge}_{0.08(1)}\text{Fe}_{0.10(1)})^{3c}(\text{Fe}_3)^{1b}(\text{N})$  in space group  $Pm\bar{3}m$  ( $a = 3.8792(1)$  Å,  $R_B = 3.52\%$ ) with 12% of a tin side phase.

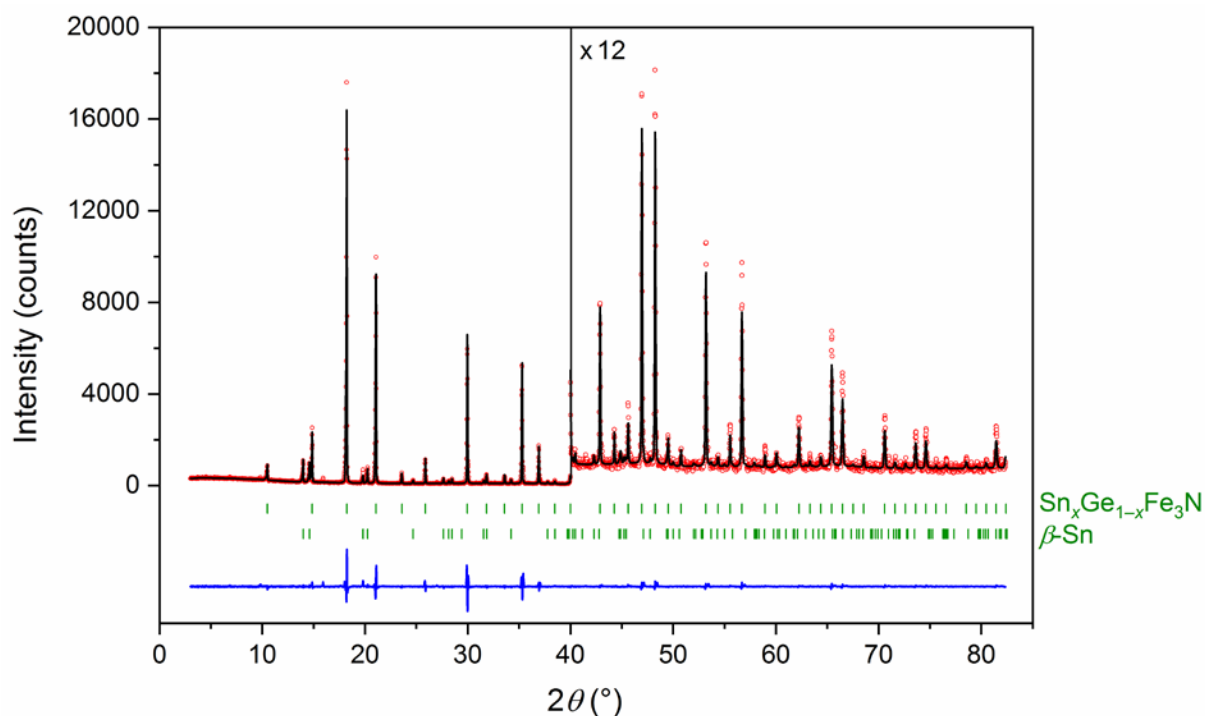

**Figure S10:** X-ray diffraction pattern measured with Mo  $K\alpha_1$  radiation and Rietveld refinement of the quaternary nitride  $^{1a}(\text{Sn}_{0.82(1)}\text{Ge}_{0.08(1)}\text{Fe}_{0.10(1)})^{3c}(\text{Fe}_3)^{1b}(\text{N})$  in space group  $Pm\bar{3}m$  ( $a = 3.8792(1)$  Å,  $R_B = 3.52\%$ ) with 12% of a tin side phase.

**Magnetic measurements:**

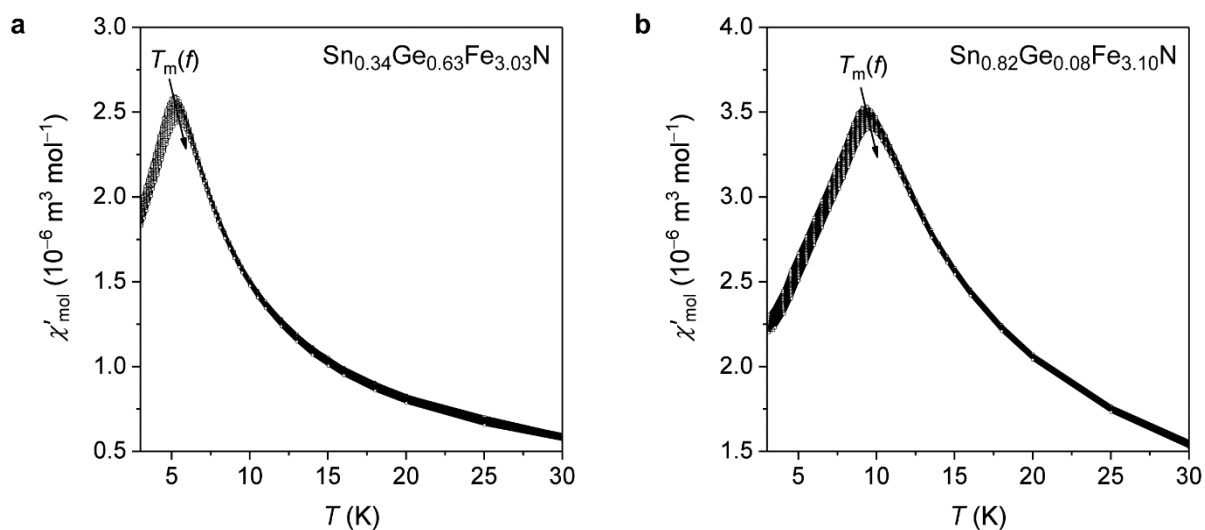

**Figure S11: a and b** Confirmation of the spin-glass behaviour for two quaternary nitrides  $\text{Sn}_x\text{Ge}_{1-x}\text{Fe}_3\text{N}$ : Temperature dependence of the real part of the molar AC susceptibility  $\chi'_m$ , measured in a frequency range  $84 \leq f \leq 10000$  Hz. The peak temperature  $T_m$  of the  $\chi'_m$  maximum depends on the frequency.

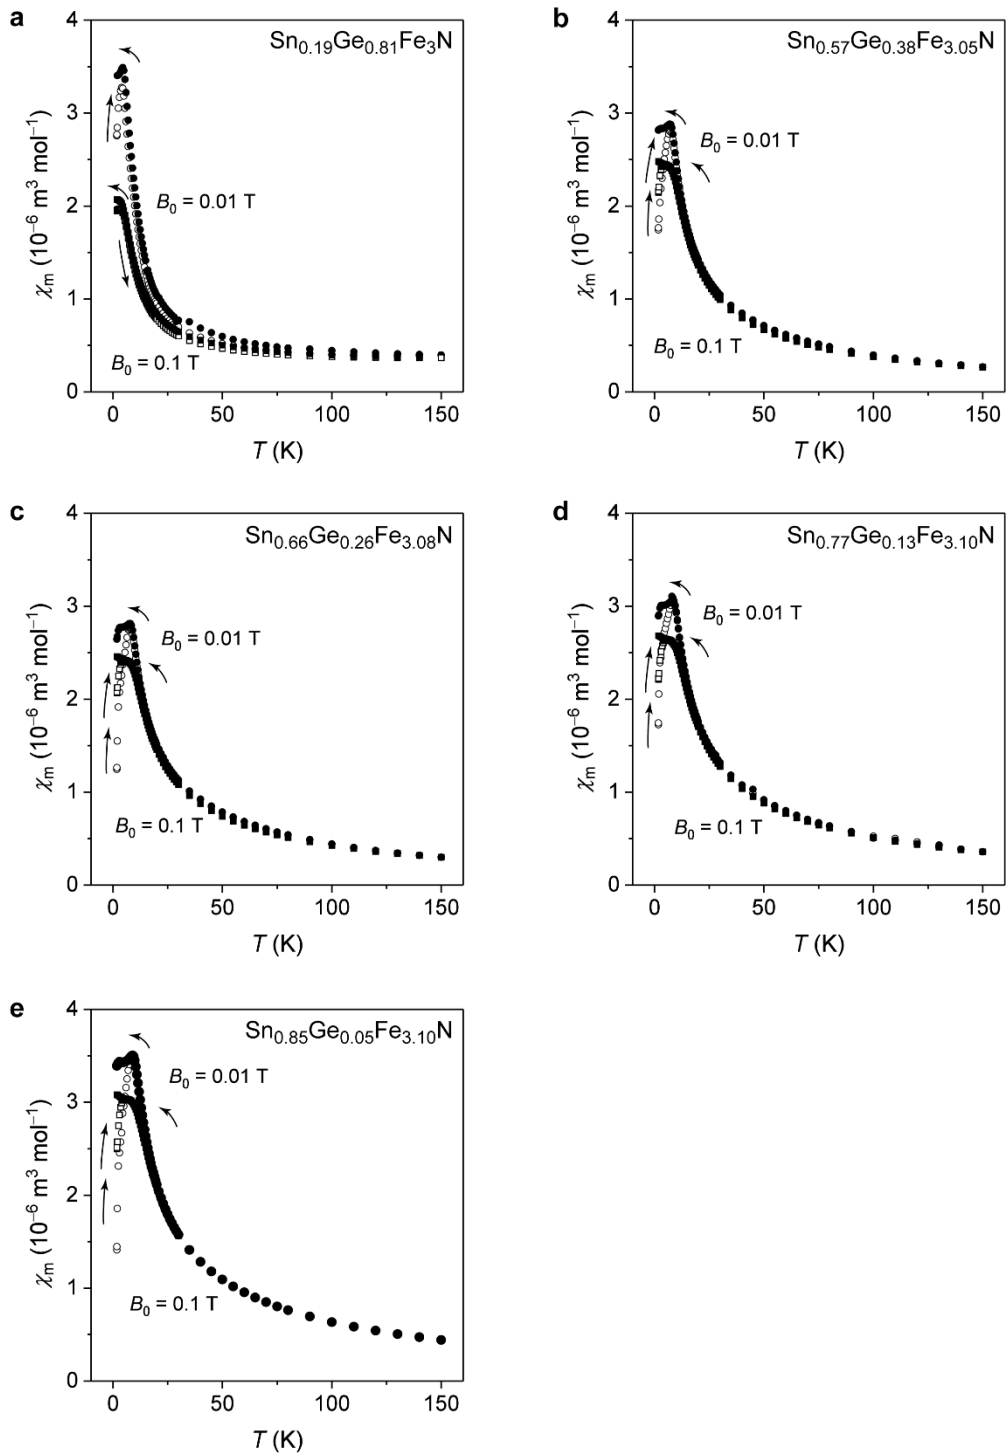

**Figure S12:** a–e Molar FC (filled symbols) and ZFC (empty symbols) DC susceptibilities for different quaternary nitrides  $\text{Sn}_x\text{Ge}_{1-x}\text{Fe}_3\text{N}$  as a function of temperature under probing fields  $B_0 = 0.01 \text{ T}$  and  $0.1 \text{ T}$ . The susceptibilities show maxima at low temperatures  $T_m$ , that characterize the magnetic transitions ( $T_g$ ). The FC and ZFC curves diverge below  $T_m$ , a fingerprint of the spin-glass behaviour in these compounds.
